# Supplementary material for: First Immunoassay for Measuring Isoaspartate in Human Serum Albumin
Source: MDPI journal article supplement (doi:10.3390/molecules26216709), 2021-11-05
Supplement: s1 [file s1]

## Supplementary materials

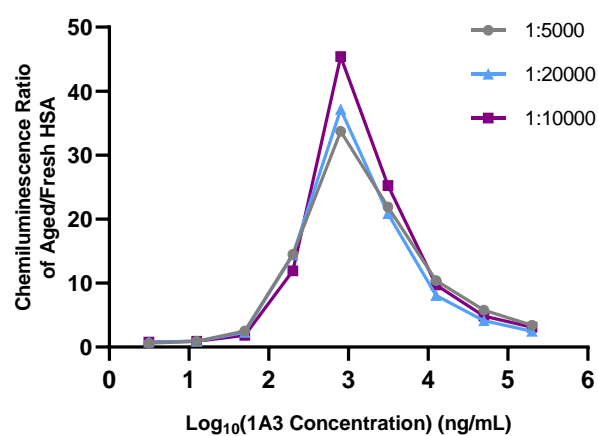

**Figure S1.** Criss-cross ELISA results illustrated that the specificity of 1A3 reaches highest when primary 1A3 antibody is 800 ng/mL and the dilution ratio of the secondary antibody is 1:10000.

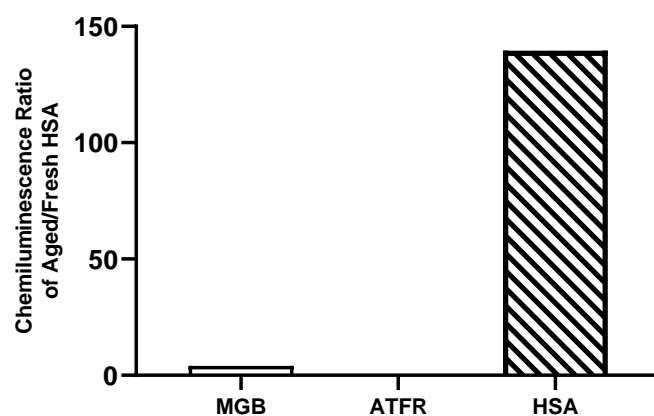

**Figure S2.** 1A3 has no specificity towards aged human transferrin (TFR) or myoglobin from equine skeletal muscle (MGB) that were artificially deamidated for 7 days.

**Table S1.** Information of plasma samples from 100 healthy donors. All tested negatively to human immunodeficiency virus (HIV), hepatitis B virus surface antigen (HBsAg) and hepatitis C virus (HCV).

| Sample No. | Gender | Age, years | Sample No. | Gender | Age, years |
|------------|--------|------------|------------|--------|------------|
| 1          | F      | 37         | 51         | M      | 48         |
| 2          | F      | 37         | 52         | M      | 37         |
| 3          | F      | 27         | 53         | M      | 21         |
| 4          | F      | 55         | 54         | M      | 29         |
| 5          | F      | 29         | 55         | M      | 40         |
| 6          | F      | 41         | 56         | M      | 36         |
| 7          | F      | 39         | 57         | M      | 28         |
| 8          | F      | 43         | 58         | M      | 35         |
| 9          | F      | 63         | 59         | M      | 29         |
| 10         | F      | 20         | 60         | M      | 31         |
| 11         | F      | 22         | 61         | M      | 30         |
| 12         | F      | 26         | 62         | M      | 53         |
| 13         | F      | 31         | 63         | M      | 22         |
| 14         | F      | 33         | 64         | M      | 38         |
| 15         | F      | 45         | 65         | M      | 46         |
| 16         | F      | 24         | 66         | M      | 27         |
| 17         | F      | 58         | 67         | M      | 40         |
| 18         | F      | 62         | 68         | M      | 53         |
| 19         | F      | 25         | 69         | M      | 28         |
| 20         | F      | 29         | 70         | M      | 35         |
| 21         | F      | 41         | 71         | M      | 54         |
| 22         | F      | 26         | 72         | M      | 25         |
| 23         | F      | 57         | 73         | M      | 59         |
| 24         | F      | 39         | 74         | M      | 28         |
| 25         | F      | 65         | 75         | M      | 48         |
| 26         | F      | 29         | 76         | F      | 40         |
| 27         | M      | 44         | 77         | M      | 20         |
| 28         | M      | 48         | 78         | F      | 37         |
| 29         | M      | 35         | 79         | M      | 25         |
| 30         | M      | 35         | 80         | F      | 48         |
| 31         | M      | 29         | 81         | M      | 35         |
| 32         | M      | 33         | 82         | F      | 32         |

|    |   |    |     |   |    |
|----|---|----|-----|---|----|
| 33 | M | 27 | 83  | F | 25 |
| 34 | M | 22 | 84  | M | 27 |
| 35 | M | 28 | 85  | F | 25 |
| 36 | M | 31 | 86  | M | 33 |
| 37 | F | 21 | 87  | M | 44 |
| 38 | F | 48 | 88  | M | 26 |
| 39 | F | 37 | 89  | M | 35 |
| 40 | M | 33 | 90  | M | 33 |
| 41 | M | 59 | 91  | M | 26 |
| 42 | M | 30 | 92  | F | 26 |
| 43 | F | 37 | 93  | M | 24 |
| 44 | M | 44 | 94  | F | 59 |
| 45 | M | 30 | 95  | F | 25 |
| 46 | M | 54 | 96  | M | 32 |
| 47 | M | 38 | 97  | F | 23 |
| 48 | M | 45 | 98  | M | 29 |
| 49 | M | 26 | 99  | M | 25 |
| 50 | M | 34 | 100 | F | 35 |

---
